# Supplementary material
Source: PubMed Central journal article supplement (PMC6278934)
Supplement: NIHMS362133-supplement-Suppl_Table_1.pdf [file NIHMS362133-supplement-Suppl_Table_1.pdf]

**Supplementary Table 1.** Association between secretor MBL2 polymorphisms and survival in white patients\*

| Genotype                      | No. (%)    | 5-year overall survival,<br>RR of death† (95% CI) |
|-------------------------------|------------|---------------------------------------------------|
| <b>Promoter SNP</b>           |            |                                                   |
| mb12_11 ( <i>rs11003125</i> ) | 215 (41.1) |                                                   |
| C/C ( <i>L/L</i> )            | 238 (45.5) | 1.0 (referent)                                    |
| C/G ( <i>L/H</i> )            | 70 (13.4)  | 0.86 (0.65 to 1.15)                               |
| G/G ( <i>H/H</i> )            |            | 1.43 (0.99 to 2.07)                               |
| mb12_12 ( <i>rs7096206</i> )  | 329 (61.7) |                                                   |
| G/G ( <i>Y/Y</i> )            | 180 (33.8) | 1.0 (referent)                                    |
| G/C ( <i>Y/X</i> )            | 24 (4.5)   | <b>0.59 (0.45 to 0.79)</b>                        |
| C/C ( <i>X/X</i> )            | 204 (38.3) | 0.81 (0.44 to 1.50)                               |
| G/C + C/C‡                    |            | <b>0.62 (0.47 to 0.81)</b>                        |
| <b>Exon 1 SNP</b>             |            |                                                   |
| mb12_03 ( <i>rs5030737</i> )  |            |                                                   |
| C/C ( <i>Non-D/Non-D</i> )    | 447 (85.0) | 1.0 (referent)                                    |
| C/T ( <i>Non-D/D</i> )        | 75 (14.2)  | 0.94 (0.66 to 1.35)                               |
| T/T ( <i>D/D</i> )            | 4 (0.8)    | 2.60 (0.64 to 10.66)                              |
| mb12_01 ( <i>rs1800450</i> )  |            |                                                   |
| G/G ( <i>Non-B/Non-B</i> )    | 391 (75.5) | 1.0 (referent)                                    |
| G/A ( <i>Non-B/B</i> )        | 120 (23.2) | 0.84 (0.62 to 1.14)                               |
| A/A ( <i>B/B</i> )            | 7 (1.3)    | 2.45 (0.90 to 6.70)                               |
| mb12_02 ( <i>rs1800451</i> )  |            |                                                   |
| G/G ( <i>Non-C/Non-C</i> )    | 479 (97.0) | 1.0 (referent)                                    |
| G/A ( <i>Non-C/C</i> )        | 14 (2.8)   | 0.91 (0.37 to 2.22)                               |
| A/A ( <i>C/C</i> )            | 1 (0.2)    | —                                                 |
| <b>Haplotype§</b>             |            |                                                   |
| GGCGG ( <i>HYA</i> )          | 294 (28.6) | 1.0 (referent)                                    |
| CGCGG ( <i>LYA</i> )          | 280 (27.3) | 1.03 (0.82 to 1.31)                               |
| CCCGG ( <i>LXA</i> )          | 220 (21.4) | <b>0.71 (0.54 to 0.92)</b>                        |
| CGCAG ( <i>LYB</i> )          | 135 (13.2) | 0.90 (0.67 to 1.21)                               |
| CGCGA ( <i>LYC</i> )          | 16 (1.6)   | 0.75 (0.31 to 1.84)                               |
| GGTGG ( <i>HYD</i> )          | 81 (7.9)   | 0.95 (0.67 to 1.36)                               |
| <b>Diplotype</b>              |            |                                                   |
| YA/YA                         | 159 (31.0) | 1.0 (referent)                                    |
| YA/XA                         | 124 (24.2) | <b>0.66 (0.46 to 0.95)</b>                        |
| XA/XA                         | 23 (4.5)   | 0.84 (0.44 to 1.58)                               |
| YA/B                          | 78 (15.2)  | 0.95 (0.65 to 1.39)                               |
| XA/B                          | 30 (5.8)   | <b>0.38 (0.19 to 0.74)</b>                        |
| YA/C                          | 8 (1.5)    | 1.25 (0.45 to 3.43)                               |
| YA/D                          | 46 (9.0)   | 0.91 (0.57 to 1.45)                               |
| XA/D                          | 17 (3.3)   | 0.57 (0.26 to 1.23)                               |
| XA/C                          | 3 (0.6)    | —                                                 |
| O/O                           | 25 (4.9)   | 1.02 (0.55 to 1.88)                               |

\*RR = risk ratio; CI = confidence interval; SNP = single-nucleotide polymorphism; — = insufficient data.

Statistically significant associations are in boldface type.

†Risk ratio of death was adjusted for sex, stage (III–IV vs. I–II), age at diagnosis, current smoking status, and pack-years of smoking.

‡A dominant model was assumed.

§SNPs are ordered in the haplotypes by location on the gene, as L/H, Y/X, A/D, A/B, and A/C.
