# Supplementary material
Source: PubMed Central journal article supplement (PMC6278934)
Supplement: NIHMS362133-supplement-Suppl_Table_2.pdf [file NIHMS362133-supplement-Suppl_Table_2.pdf]

**Supplementary Table 2.** Association between secretor MBL2 polymorphisms and disease-specific survival, stratified by study population\*

| Genotype                      | Case patients from case-control study |                            |                           |                      | Case-only series |                            |                           |                       |
|-------------------------------|---------------------------------------|----------------------------|---------------------------|----------------------|------------------|----------------------------|---------------------------|-----------------------|
|                               | White patients                        |                            | African American patients |                      | White patients   |                            | African American patients |                       |
|                               | No.                                   | RR of death† (95% CI)      | No.                       | RR of death (95% CI) | No.              | RR of death† (95% CI)      | No.                       | RR of death† (95% CI) |
| Promoter SNP                  |                                       |                            |                           |                      |                  |                            |                           |                       |
| mbl2_11 ( <i>rs11003125</i> ) |                                       |                            |                           |                      |                  |                            |                           |                       |
| C/C ( <i>L/L</i> )            | 140                                   | 1.0 (referent)             | 89                        | 1.0 (referent)       | 75               | 1.0 (referent)             | 31                        | 1.0 (referent)        |
| C/G ( <i>L/H</i> )            | 159                                   | 1.10 (0.75 to 1.61)        | 35                        | 1.08 (0.60 to 1.95)  | 79               | 0.72 (0.45 to 1.15)        | 9                         | 0.64 (0.19 to 2.20)   |
| G/G ( <i>H/H</i> )            | 49                                    | 1.12 (0.67 to 1.89)        | 4                         | 2.11 (0.63 to 7.04)  | 21               | 1.70 (0.89 to 3.26)        | 0                         | —                     |
| mbl2_12 ( <i>rs7096206</i> )  |                                       |                            |                           |                      |                  |                            |                           |                       |
| G/G ( <i>Y/Y</i> )            | 219                                   | 1.0 (referent)             | 93                        | 1.0 (referent)       | 110              | 1.0 (referent)             | 31                        | 1.0 (referent)        |
| G/C ( <i>Y/X</i> )            | 120                                   | <b>0.65 (0.45 to 0.93)</b> | 31                        | 1.07 (0.59 to 1.93)  | 60               | <b>0.56 (0.34 to 0.92)</b> | 10                        | 1.69 (0.57 to 5.01)   |
| C/C ( <i>X/X</i> )            | 15                                    | 0.59 (0.24 to 1.48)        | 3                         | 1.81 (0.41 to 7.99)  | 9                | 0.55 (0.17 to 1.83)        | 1                         | —                     |
| G/C + C/C                     | 135                                   | <b>0.64 (0.45 to 0.91)</b> | 34                        | 1.13 (0.64 to 1.99)  | 69               | <b>0.56 (0.35 to 0.90)</b> | 11                        | 1.90 (0.68 to 5.32)   |
| Exon 1 SNP                    |                                       |                            |                           |                      |                  |                            |                           |                       |
| mbl2_03 ( <i>rs5030737</i> )  |                                       |                            |                           |                      |                  |                            |                           |                       |
| C/C ( <i>Non-D/Non-D</i> )    | 292                                   | 1.0 (referent)             | 122                       | 1.0 (referent)       | 155              | 1.0 (referent)             | 38                        | 1.0 (referent)        |
| C/T ( <i>Non-D/D</i> )        | 56                                    | 0.74 (0.47 to 1.16)        | 5                         | 0.43 (0.10 to 1.81)  | 19               | 1.72 (0.94 to 3.13)        | 1                         | —                     |
| T/T ( <i>D/D</i> )            | 3                                     | 2.82 (0.38 to 20.72)       | 0                         | —                    | 1                | —                          | 0                         | —                     |
| mbl2_01 ( <i>rs1800450</i> )  |                                       |                            |                           |                      |                  |                            |                           |                       |
| G/G ( <i>Non-B/Non-B</i> )    | 264                                   | 1.0 (referent)             | 117                       | 1.0 (referent)       | 127              | 1.0 (referent)             | 35                        | 1.0 (referent)        |
| G/A ( <i>Non-B/B</i> )        | 80                                    | 1.00 (0.67 to 1.51)        | 7                         | 1.30 (0.29 to 5.81)  | 40               | 0.80 (0.48 to 1.34)        | 6                         | 1.55 (0.49 to 4.92)   |
| A/A ( <i>B/B</i> )            | 3                                     | 3.19 (0.43 to 23.60)       | 1                         | —                    | 4                | 1.20 (0.28 to 5.03)        | 0                         | —                     |
| mbl2_02 ( <i>rs1800451</i> )  |                                       |                            |                           |                      |                  |                            |                           |                       |
| G/G ( <i>Non-C/Non-C</i> )    | 337                                   | 1.0 (referent)             | 73                        | 1.0 (referent)       | 42               | 1.0 (referent)             | 18                        | 1.0 (referent)        |
| G/A ( <i>Non-C/C</i> )        | 8                                     | 1.38 (0.50 to 3.77)        | 42                        | 0.92 (0.53 to 1.59)  | 6                | 0.65 (0.09 to 4.95)        | 16                        | 1.08 (0.37 to 3.09)   |
| A/A ( <i>C/C</i> )            | 1                                     | —                          | 6                         | 0.59 (0.14 to 2.53)  | 0                | —                          | 4                         | 7.42 (1.16 to 47.60)  |
| Haplotype                     |                                       |                            |                           |                      |                  |                            |                           |                       |
| GGCGG ( <i>HYA</i> )          | 192                                   | 1.0 (referent)             | 38                        | 1.0 (referent)       | 102              | 1.0 (referent)             | 8                         | 1.0 (referent)        |
| CGCGG ( <i>LYA</i> )          | 186                                   | 1.00 (0.73 to 1.37)        | 107                       | 0.65 (0.38 to 1.11)  | 94               | 1.38 (0.94 to 2.05)        | 28                        | 0.93 (0.33 to 2.65)   |

| Genotype             | Case patients from case-control study |                            |                           |                      | Case-only series |                            |                           |                       |
|----------------------|---------------------------------------|----------------------------|---------------------------|----------------------|------------------|----------------------------|---------------------------|-----------------------|
|                      | White patients                        |                            | African American patients |                      | White patients   |                            | African American patients |                       |
|                      | No.                                   | RR of death† (95% CI)      | No.                       | RR of death (95% CI) | No.              | RR of death† (95% CI)      | No.                       | RR of death† (95% CI) |
| CCCGG ( <i>LXA</i> ) | 142                                   | <b>0.69 (0.48 to 0.99)</b> | 34                        | 0.72 (0.38 to 1.35)  | 78               | 0.70 (0.44 to 1.12)        | 12                        | 2.31 (0.73 to 7.34)   |
| CGCAG ( <i>LYB</i> ) | 84                                    | 1.03 (0.69 to 1.54)        | 9                         | 0.56 (0.13 to 2.48)  | 51               | 0.96 (0.59 to 1.55)        | 6                         | 1.67 (0.43 to 6.48)   |
| CGCGA ( <i>LYC</i> ) | 10                                    | 1.17 (0.42 to 3.20)        | 53                        | 0.58 (0.32 to 1.06)  | 6                | 0.52 (0.07 to 3.82)        | 23                        | 1.22 (0.43 to 3.44)   |
| GGTGG ( <i>HYD</i> ) | 60                                    | 0.73 (0.46 to 1.16)        | 5                         | 0.31 (0.07 to 1.37)  | 21               | 1.85 (0.99 to 3.34)        | 1                         | —                     |
| Diplotype            |                                       |                            |                           |                      |                  |                            |                           |                       |
| YA/YA                | 98                                    | 1.0                        | 40                        | 1.0                  | 61               | 1.0                        | 6                         | 1.0                   |
| YA/XA                | 85                                    | 0.72 (0.45 to 1.16)        | 25                        | 1.30 (0.64 to 2.64)  | 39               | 0.65 (0.35 to 1.21)        | 6                         | 1.30 (0.64 to 2.64)   |
| XA/XA                | 14                                    | 0.61 (0.23 to 1.59)        | 2                         | —                    | 9                | 0.56 (0.16 to 1.90)        | 1                         | —                     |
| YA/B                 | 52                                    | 1.27 (0.77 to 2.10)        | 4                         | 0.96 (0.12 to 7.61)  | 26               | 0.81 (0.43 to 1.54)        | 3                         | 0.96 (0.12 to 7.61)   |
| XA/B                 | 19                                    | <b>0.30 (0.09 to 0.99)</b> | 0                         | —                    | 11               | 0.37 (0.13 to 1.06)        | 2                         | —                     |
| YA/C                 | 6                                     | 1.57 (0.48 to 5.18)        | 33                        | 1.15 (0.59 to 2.25)  | 2                | —                          | 14                        | 1.15 (0.59 to 2.25)   |
| YA/D                 | 39                                    | 0.65 (0.36 to 1.17)        | 3                         | 0.26 (0.03 to 1.99)  | 7                | <b>3.03 (1.22 to 7.52)</b> | 1                         | —                     |
| XA/D                 | 9                                     | 0.59 (0.21 to 1.67)        | 0                         | —                    | 8                | 0.58 (0.17 to 1.91)        | 0                         | —                     |
| XA/C                 | 1                                     | —                          | 5                         | 0.32 (0.07 to 1.46)  | 2                | —                          | 2                         | —                     |
| O/O                  | 14                                    | 0.80 (0.31 to 2.10)        | 11                        | 0.62 (0.18 to 2.17)  | 11               | 1.36 (0.60 to 3.08)        | 4                         | 0.62 (0.18 to 2.17)   |

\*RR = risk ratio; CI = confidence interval; SNP = single-nucleotide polymorphism; — = insufficient data. Statistically significant associations are in boldface type.

†Risk ratio of death was adjusted for sex, stage (III–IV vs. I–II), age at diagnosis, current smoking status, and pack-years of smoking.
